# Supplementary material for: A Low-Fat/Sucrose Diet Rich in Complex Carbohydrates Reverses High-Fat/Sucrose Diet-Induced Corneal Dysregulation
Source: MDPI journal article supplement (doi:10.3390/ijms24020931), 2023-01-04
Supplement: s1 [file s1]

**Table S1** Materials and equipment used in experiment

| <b>Name of Material/ Equipment</b> | <b>Company</b>               | <b>Catalog/Product Number</b> |
|------------------------------------|------------------------------|-------------------------------|
| Anti-CD31 antibody                 | BD Bioscience, Pharmingen    | 550274                        |
| Anti-CD41 antibody                 | BD Bioscience, Pharmingen    | 553847                        |
| Anti-Ly6G antibody                 | BD Bioscience, Pharmingen    | 551459                        |
| Bovine serum albumin (BSA)         | ThermoFisher scientific      | B14                           |
| Cochet-Bonnet aesthesiometer       | Richmond Products            |                               |
| C57BL/6 mice                       | Jackson Laboratories         | 664                           |
| DAPI                               | Sigma Aldrich                | D8417                         |
| Golf-club spud                     | Stephens instruments         | S2-1135                       |
| ImageJ software                    | National Institute of Health |                               |
| Isoflurane                         | Patterson veterinary         | 07-893-1389                   |
| Ketamine                           | Vedco                        | VINV-KETA-0VED                |
| Mouse insulin ELISA kit            | Thermo Fisher Scientific     | EMINS                         |
| OneTouch Ultra glucose meter       | LifeScan                     |                               |
| Phosphate buffered saline (PBS)    | ThermoFisher scientific      | AM9624                        |
| Sodium fluorescein salt            | Sigma Aldrich                | 46970                         |
| Trephine                           | Integra Miltex               | 33-31                         |
| TritonX -100                       | Fisher Scientific            | 50-295-34                     |
| Xylazine                           | Vedco                        |                               |
